# Supplementary material for: The Rice NAD+-Dependent Histone Deacetylase OsSRT1 Targets Preferentially to Stress- and Metabolism-Related Genes and Transposable Elements
Source: PubMed Central journal article supplement (PMC3692531; doi:10.1371/journal.pone.0066807), 2013-06-25
Supplement: pone.0066807.s007.pdf [file pone.0066807.s007.pdf]

**Table S1.** List of genes that showed OsSRT1 binding and H3K9ac increase in *OsSRT1* RNAi plants. The 37 genes on which OsSRT1-binding peaks overlapped with that of H3K9ac increases are marked in yellow.

| MSU Locus      | OsSRT1 CHIP | H3K9ac ChIP-seq reads |             | Gene function Annotation                                                            | Microarray folds in RNAi versus WT plants |          |          |
|----------------|-------------|-----------------------|-------------|-------------------------------------------------------------------------------------|-------------------------------------------|----------|----------|
|                | seq reads   | MH63 (WT)             | OsSRT1 RNAi |                                                                                     | Repeat1                                   | Repeat 2 | Repeat 3 |
| LOC_Os05g41290 | 33          | 114                   | 323         | disease resistance RPP13-like protein 1, putative, expressed                        |                                           |          |          |
| LOC_Os08g12780 | 10          | 133                   | 273         | chloroplast envelope membrane protein, putative, expressed                          |                                           |          |          |
| LOC_Os07g35335 | 10          | 86                    | 234         | expressed protein                                                                   |                                           |          |          |
| LOC_Os01g52304 | 25          | 147                   | 485         | NB-ARC domain containing protein, expressed                                         |                                           |          |          |
| LOC_Os03g07310 | 11          | 120                   | 1246        | growth regulator related protein, putative, expressed                               |                                           |          |          |
| LOC_Os01g05090 | 11          | 127                   | 327         | expressed protein                                                                   |                                           |          |          |
| LOC_Os04g42000 | 14          | 184                   | 514         | 6,7-dimethyl-8-ribityllumazine synthase, chloroplast precursor, putative, expressed | 1,5157                                    | 1,2311   | 1,516    |
| LOC_Os11g45000 | 36          | 49                    | 106         | retrotransposon protein, putative, unclassified                                     |                                           |          |          |
| LOC_Os12g41700 | 11          | 202                   | 437         | LSD1 zinc finger domain containing protein, expressed                               | 1,2311                                    | 1,2311   | 1,32     |
| LOC_Os06g11440 | 15          | 41                    | 313         | transposon protein, putative, Mutator sub-class, expressed                          |                                           |          |          |
| LOC_Os01g31580 | 14          | 216                   | 466         | BZIP protein, putative, expressed                                                   |                                           |          |          |
| LOC_Os03g07320 | 11          | 120                   | 348         | transposon protein, putative, Pong sub-class                                        |                                           |          |          |
| LOC_Os03g41510 | 24          | 137                   | 408         | oxidoreductase, aldo/keto reductase family protein, putative, expressed             |                                           |          |          |
| LOC_Os08g42670 | 34          | 136                   | 342         | resistance protein, putative, expressed                                             |                                           |          |          |
| LOC_Os03g11910 | 17          | 136                   | 329         | DnaK family protein, putative, expressed                                            |                                           |          |          |
| LOC_Os11g44990 | 36          | 49                    | 106         | NB-ARC domain containing protein, expressed                                         |                                           |          |          |
| LOC_Os03g37820 | 18          | 44                    | 122         | hypothetical protein                                                                |                                           |          |          |
| LOC_Os08g15840 | 14          | 180                   | 405         | ankyrin repeat-rich protein, putative, expressed                                    | 1,0718                                    | 2        | 1,072    |
| LOC_Os05g34010 | 12          | 51                    | 115         | peptide transporter PTR2, putative, expressed                                       |                                           |          |          |
| LOC_Os01g02880 | 23          | 173                   | 371         | fructose-bisphosphate aldolase isozyme, putative, expressed                         | 1,3195                                    | 1,0718   | 1,072    |
| LOC_Os05g03200 | 12          | 83                    | 453         | expressed protein                                                                   |                                           |          |          |
| LOC_Os01g18230 | 17          | 57                    | 183         | FAD-linked oxidoreductase protein, putative, expressed                              |                                           |          |          |
| LOC_Os04g53680 | 20          | 236                   | 580         | cyclin, putative, expressed                                                         |                                           |          |          |
| LOC_Os03g62160 | 10          | 135                   | 334         | expressed protein                                                                   |                                           |          |          |
| LOC_Os08g36790 | 17          | 146                   | 306         | bZIP transcription factor, putative, expressed                                      |                                           |          |          |
| LOC_Os02g17470 | 10          | 72                    | 209         | RNA-binding protein-related, putative, expressed                                    |                                           |          |          |
| LOC_Os02g33540 | 10          | 54                    | 128         | translational activator family protein, putative, expressed                         |                                           |          |          |

|                |    |     |      |                                                                                |        |        |       |
|----------------|----|-----|------|--------------------------------------------------------------------------------|--------|--------|-------|
| LOC_Os05g34854 | 11 | 55  | 244  | gibberellin 20 oxidase 2, putative, expressed                                  |        |        |       |
| LOC_Os07g30170 | 17 | 97  | 240  | nitrilase, putative, expressed                                                 |        |        |       |
| LOC_Os01g12890 | 20 | 163 | 466  | expressed protein                                                              |        |        |       |
| LOC_Os06g45020 | 10 | 93  | 480  | STRUBBELIG-RECEPTOR FAMILY 3 precursor, putative, expressed                    |        |        |       |
| LOC_Os03g41339 | 10 | 77  | 258  | hypothetical protein                                                           |        |        |       |
| LOC_Os06g05710 | 16 | 268 | 693  | pollen-specific protein, putative, expressed                                   | 9,1896 | 5,6569 | 3,031 |
| LOC_Os02g03100 | 14 | 233 | 511  | oxidoreductase, aldo/keto reductase family protein, putative, expressed        | 1,0718 | 1,2311 | 1,231 |
| LOC_Os03g53020 | 14 | 282 | 574  | helix-loop-helix DNA-binding domain containing protein, expressed              |        |        |       |
| LOC_Os10g42950 | 16 | 506 | 1156 | cyclin-dependent kinase E-1, putative, expressed                               |        |        |       |
| LOC_Os02g03090 | 14 | 233 | 511  | expressed protein                                                              | 1,2311 | 1,4142 | 1,072 |
| LOC_Os06g51230 | 10 | 153 | 788  | conserved hypothetical protein                                                 |        |        |       |
| LOC_Os12g39420 | 10 |     | 528  | nucleobase-ascorbate transporter, putative, expressed                          | 2,2974 | 1,5157 | 1,149 |
| LOC_Os07g10550 | 26 |     | 132  | cyclin-related protein, putative, expressed                                    |        |        |       |
| LOC_Os06g10130 | 16 |     | 224  | expressed protein                                                              |        |        |       |
| LOC_Os02g58170 | 18 |     | 53   | transposon protein, putative, unclassified                                     | 1,1487 | 1,4142 | 8     |
| LOC_Os11g07870 | 20 |     | 187  | DEAD/DEAH box helicase domain containing protein, expressed                    |        |        |       |
| LOC_Os08g38850 | 17 |     | 305  | phosphatidylinositol transfer, putative, expressed                             | 1,8661 | 1,2311 | 1,149 |
| LOC_Os07g37270 | 10 |     | 45   | MSP domain containing protein, putative, expressed                             | 1,2311 | 1,1487 | 1,231 |
| LOC_Os05g34100 | 12 |     | 127  | hypothetical protein                                                           |        |        |       |
| LOC_Os04g42100 | 15 |     | 624  | retrotransposon protein, putative, unclassified, expressed                     |        |        |       |
| LOC_Os06g50280 | 14 |     | 52   | OsFBL31 - F-box domain and LRR containing protein                              |        |        |       |
| LOC_Os05g45140 | 18 |     | 36   | glucosyl transferase, putative, expressed                                      |        |        |       |
| LOC_Os07g47840 | 17 |     | 63   | expressed protein                                                              |        |        |       |
| LOC_Os03g62150 | 10 |     | 54   | heat shock protein DnaJ, putative                                              |        |        |       |
| LOC_Os11g10710 | 16 |     | 49   | protein kinase domain containing protein, expressed                            | 2,1435 | 1,4142 | 1,625 |
| LOC_Os10g29650 | 26 |     | 291  | retrotransposon protein, putative, unclassified, expressed                     |        |        |       |
| LOC_Os03g07330 | 11 |     | 115  | pentatricopeptide, putative, expressed                                         |        |        |       |
| LOC_Os01g50420 | 12 |     | 59   | STE_MEKK_ste11_MAP3K.7 - STE kinases , expressed                               |        |        |       |
| LOC_Os04g49500 | 14 |     | 221  | U-box domain-containing protein, putative, expressed                           |        |        |       |
| LOC_Os02g29190 | 30 |     | 67   | ankyrin, putative, expressed                                                   | 3,249  | 3,4822 | 4,925 |
| LOC_Os12g08720 | 15 |     | 65   | ramtrack, Broad Complex BTB domain with H family conserved sequence, expressed |        |        |       |

|                |    |     |                                                                                |        |        |       |
|----------------|----|-----|--------------------------------------------------------------------------------|--------|--------|-------|
| LOC_Os05g28530 | 10 | 45  | glutaredoxin, putative                                                         |        |        |       |
| LOC_Os03g25250 | 12 | 44  | OsFBX90 - F-box domain containing protein                                      |        |        |       |
| LOC_Os01g35950 | 12 | 39  | hypothetical protein                                                           |        |        |       |
| LOC_Os12g05655 | 10 | 459 | expressed protein                                                              |        |        |       |
| LOC_Os04g43560 | 13 | 97  | no apical meristem protein, putative, expressed                                |        |        |       |
| LOC_Os12g34940 | 14 | 61  | hypothetical protein                                                           |        |        |       |
| LOC_Os02g07960 | 15 | 261 | STRUBBELIG-RECEPTOR FAMILY 3 precursor, putative, expressed                    | 1,5157 | 1,7411 | 1,516 |
| LOC_Os04g07830 | 14 | 67  | conserved hypothetical protein                                                 | 1,0718 | 2,1435 | 1,414 |
| LOC_Os02g07860 | 15 | 82  | conserved hypothetical protein                                                 |        |        |       |
| LOC_Os03g03900 | 12 | 299 | NIN, putative, expressed                                                       |        |        |       |
| LOC_Os01g65200 | 10 | 245 | proton-dependent oligopeptide transport, putative, expressed                   | 1,3195 | 1,4142 | 1,516 |
| LOC_Os01g66840 | 10 | 619 | pectinacylesterase domain containing protein                                   |        |        |       |
| LOC_Os06g19170 | 22 | 519 | cadmium tolerance factor, putative, expressed                                  |        |        |       |
| LOC_Os01g50140 | 11 | 56  | transposon protein, putative, unclassified                                     |        |        |       |
| LOC_Os03g45830 | 32 | 65  | OsSAUR15 - Auxin-responsive SAUR gene family member                            |        |        |       |
| LOC_Os07g35060 | 10 | 187 | OsFBX238 - F-box domain containing protein, expressed                          |        |        |       |
| LOC_Os04g43700 | 10 | 502 | glycosyl transferase 8 domain containing protein, putative, expressed          |        |        |       |
| LOC_Os01g12570 | 10 | 78  | 3-methyl-2-oxobutanoate hydroxymethyltransferase, putative, expressed          |        |        |       |
| LOC_Os10g43050 | 12 | 192 | OsClp11 - Putative Clp protease homologue, expressed                           |        |        |       |
| LOC_Os01g13830 | 14 | 51  | expressed protein                                                              |        |        |       |
| LOC_Os03g64140 | 10 | 67  | expressed protein                                                              |        |        |       |
| LOC_Os12g35760 | 31 | 46  | transposon protein, putative, unclassified                                     |        |        |       |
| LOC_Os03g05820 | 14 | 44  | kinesin motor domain containing protein, expressed                             | 1,8661 | 1,1487 | 1,072 |
| LOC_Os02g51770 | 28 | 372 | TLD family protein, putative, expressed                                        |        |        |       |
| LOC_Os04g46280 | 10 | 213 | hydrolase, NUDIX family, domain containing protein, expressed                  |        |        |       |
| LOC_Os03g18810 | 16 | 203 | aminotransferase, classes I and II, domain containing protein, expressed       |        |        |       |
| LOC_Os12g39410 | 10 | 528 | hypothetical protein                                                           |        |        |       |
| LOC_Os06g48500 | 13 | 349 | expressed protein                                                              |        |        |       |
| LOC_Os01g65210 | 10 | 245 | proton-dependent oligopeptide transport, putative, expressed                   | 1,2311 | 1,4142 | 1,516 |
| LOC_Os04g55720 | 19 | 98  | D-3-phosphoglycerate dehydrogenase, chloroplast precursor, putative, expressed |        |        |       |
| LOC_Os04g18830 | 10 | 140 | MATH domain containing protein                                                 |        |        |       |

|                |    |     |                                                                                    |        |        |       |
|----------------|----|-----|------------------------------------------------------------------------------------|--------|--------|-------|
| LOC_Os02g14150 | 12 | 57  | transposon protein, putative, unclassified                                         |        |        |       |
| LOC_Os05g27890 | 12 | 53  | hypothetical protein                                                               |        |        |       |
| LOC_Os06g23980 | 14 | 177 | transcription factor, putative                                                     |        |        |       |
| LOC_Os04g46290 | 10 | 213 | ethylene-responsive element-binding protein, putative, expressed                   |        |        |       |
| LOC_Os11g45410 | 10 | 82  | conserved hypothetical protein                                                     |        |        |       |
| LOC_Os02g56560 | 14 | 376 | CK1_CaseinKinase_1.6 - CK1 includes the casein kinase 1 kinases, expressed         |        |        |       |
| LOC_Os05g41160 | 10 | 121 | expressed protein                                                                  |        |        |       |
| LOC_Os03g19670 | 12 | 165 | GDSL-like lipase/acylhydrolase, putative, expressed                                |        |        |       |
| LOC_Os12g34950 | 14 | 61  | retrotransposon protein, putative, unclassified                                    |        |        |       |
| LOC_Os02g42950 | 31 | 57  | YABBY domain containing protein, putative, expressed                               |        |        |       |
| LOC_Os04g32980 | 14 | 462 | protein binding protein, putative, expressed                                       |        |        |       |
| LOC_Os01g04690 | 10 | 61  | hypothetical protein                                                               | 2      | 1,4142 | 1,741 |
| LOC_Os03g57950 | 36 | 222 | type I inositol-1,4,5-trisphosphate 5-phosphatase, putative, expressed             |        |        |       |
| LOC_Os04g57140 | 20 | 199 | kinesin motor domain containing protein, putative, expressed                       |        |        |       |
| LOC_Os11g23770 | 13 | 83  | cysteine protease, putative, expressed                                             |        |        |       |
| LOC_Os06g24980 | 11 | 67  | transposon protein, putative, CACTA, En/Spm sub-class                              |        |        |       |
| LOC_Os08g15070 | 14 | 59  | GDU1, putative                                                                     |        |        |       |
| LOC_Os08g40510 | 10 | 533 | KID-containing protein, putative, expressed                                        |        |        |       |
| LOC_Os06g09540 | 19 | 358 | SAC domain containing protein, putative, expressed                                 |        |        |       |
| LOC_Os06g38480 | 14 | 42  | retrotransposon protein, putative, unclassified, expressed                         |        |        |       |
| LOC_Os03g19950 | 10 | 45  | hypothetical protein                                                               |        |        |       |
| LOC_Os11g38640 | 12 | 130 | expressed protein                                                                  |        |        |       |
| LOC_Os08g13180 | 10 | 40  | Framtrack, Broad Complex BTB domain with Meprin and TRAF Homology MATH domain      |        |        |       |
| LOC_Os01g34080 | 14 | 63  | armadillo/beta-catenin-like repeat family protein, expressed                       |        |        |       |
| LOC_Os10g33650 | 16 | 159 | CK1_CaseinKinase_1.9 - CK1 includes the casein kinase 1 kinases, expressed         | 1,6245 | 1,0718 | 1,231 |
| LOC_Os03g11600 | 35 | 131 | YABBY domain containing protein, putative, expressed                               |        |        |       |
| LOC_Os09g31210 | 10 | 63  | AGC_PVPK_like_CDK8.1 - ACG kinases include homologs to PKA, PKG and PKC, expressed |        |        |       |
| LOC_Os01g04680 | 10 | 61  | retrotransposon protein, putative, unclassified                                    | 1,0718 | 1,0718 | 1,072 |
| LOC_Os06g14050 | 16 | 80  | membrane attack complex component/perforin/complement C9, putative, expressed      |        |        |       |
| LOC_Os03g20580 | 10 | 103 | expressed protein                                                                  |        |        |       |
| LOC_Os02g35610 | 16 | 171 | expressed protein                                                                  | 1,1487 | 1,0718 | 1,231 |

|                |    |     |                                                                         |        |        |       |
|----------------|----|-----|-------------------------------------------------------------------------|--------|--------|-------|
| LOC_Os05g37350 | 10 | 64  | hhH-GPD superfamily base excision DNA repair protein                    | 1,7411 | 1,8661 | 1,32  |
| LOC_Os04g32470 | 11 | 93  | expressed protein                                                       |        |        |       |
| LOC_Os12g05650 | 10 | 459 | ACT domain containing protein, expressed                                |        |        |       |
| LOC_Os11g26910 | 10 | 173 | SKP1-like protein 1B, putative, expressed                               |        |        |       |
| LOC_Os03g25260 | 12 | 44  | HIT zinc finger domain containing protein, expressed                    |        |        |       |
| LOC_Os07g43370 | 11 | 80  | amine oxidase family protein, putative, expressed                       |        |        |       |
| LOC_Os04g42770 | 18 | 262 | expressed protein                                                       |        |        |       |
| LOC_Os12g37770 | 10 | 67  | RGH1A, putative, expressed                                              |        |        |       |
| LOC_Os06g24990 | 11 | 67  | xylanase inhibitor protein 1 precursor, putative, expressed             | 1,2311 | 1,2311 | 1,149 |
| LOC_Os03g06530 | 12 | 213 | hypothetical protein                                                    |        |        |       |
| LOC_Os12g34470 | 22 | 59  | hypothetical protein                                                    |        |        |       |
| LOC_Os02g43380 | 11 | 70  | hypothetical protein                                                    |        |        |       |
| LOC_Os10g22430 | 14 | 635 | gibberellin response modulator protein, putative, expressed             |        |        |       |
| LOC_Os02g45770 | 27 | 66  | OsMADS6 - MADS-box family gene with MIKc type-box, expressed            |        |        |       |
| LOC_Os04g29350 | 20 | 49  | retrotransposon protein, putative, unclassified                         |        |        |       |
| LOC_Os12g27220 | 21 | 176 | transferase family protein, putative, expressed                         |        |        |       |
| LOC_Os03g25280 | 12 | 351 | peroxidase precursor, putative, expressed                               |        |        |       |
| LOC_Os03g09820 | 13 | 40  | transcription initiation factor IIB, putative                           |        |        |       |
| LOC_Os07g47300 | 14 | 291 | spo0B-associated GTP-binding protein, putative, expressed               |        |        |       |
| LOC_Os02g43390 | 11 | 70  | retrotransposon protein, putative, Ty3-gypsy subclass                   |        |        |       |
| LOC_Os02g03294 | 14 | 330 | cyclin, putative, expressed                                             |        |        |       |
| LOC_Os01g27260 | 10 | 62  | glutathione S-transferase, putative, expressed                          |        |        |       |
| LOC_Os10g42230 | 12 | 141 | AT hook motif domain containing protein, expressed                      | 2,1435 | 1,6245 | 1,414 |
| LOC_Os03g25060 | 12 | 137 | expressed protein                                                       |        |        |       |
| LOC_Os04g33240 | 10 | 61  | sex determination protein tasselseed-2, putative, expressed             |        |        |       |
| LOC_Os06g38490 | 14 | 42  | retrotransposon protein, putative, unclassified                         |        |        |       |
| LOC_Os01g06450 | 15 | 479 | glycosyltransferase family 43 protein, putative, expressed              |        |        |       |
| LOC_Os08g33082 | 12 | 196 | DNA-repair protein complementing XP-C cells, putative, expressed        |        |        |       |
| LOC_Os05g41150 | 10 | 121 | expressed protein                                                       |        |        |       |
| LOC_Os02g52830 | 12 | 69  | lipase, putative, expressed                                             |        |        |       |
| LOC_Os04g54180 | 10 | 307 | serine/threonine-protein kinase receptor precursor, putative, expressed |        |        |       |

|                |    |     |                                                               |        |        |       |
|----------------|----|-----|---------------------------------------------------------------|--------|--------|-------|
| LOC_Os10g42930 | 12 | 475 | hypothetical protein                                          |        |        |       |
| LOC_Os12g16080 | 14 | 87  | expressed protein                                             |        |        |       |
| LOC_Os06g45080 | 16 | 348 | rabGAP/TBC domain-containing protein, putative, expressed     | 1,0718 | 1,3195 | 1,072 |
| LOC_Os01g07160 | 11 | 77  | OsFBX3 - F-box domain containing protein                      |        |        |       |
| LOC_Os01g57420 | 14 | 155 | diacylglycerol kinase, putative, expressed                    |        |        |       |
| LOC_Os04g37690 | 18 | 119 | RNA recognition motif containing protein, putative, expressed |        |        |       |
